# Supplementary material for: The Impact of Aqueous Phase Replacement Reaction on the Phase State of Internally Mixed Organic/ammonium Aerosols
Source: Copernicus journal article supplement (doi:10.5194/egusphere-2024-1556), 2024-06-24
Supplement: Supplementary file 1 [file egusphere-2024-1556-supplement.pdf]

## **Supplement of**

# **The Impact of Aqueous Phase Replacement Reaction on the Phase State of Internally Mixed Organic/ammonium Aerosols**

**Hui Yang, Fengfeng Dong, Li Xia, Qishen Huang, Shufeng Pang, Yunhong Zhang**

School of Chemistry and Chemical Engineering, Beijing Institute of Technology, Beijing, 100081, People's Republic of China

**Correspondence:** Qishen Huang (qishenh@bit.edu.cn), Shufeng Pang (sfpang@bit.edu.cn)

**Summary:** 6 pages, 6 figures.

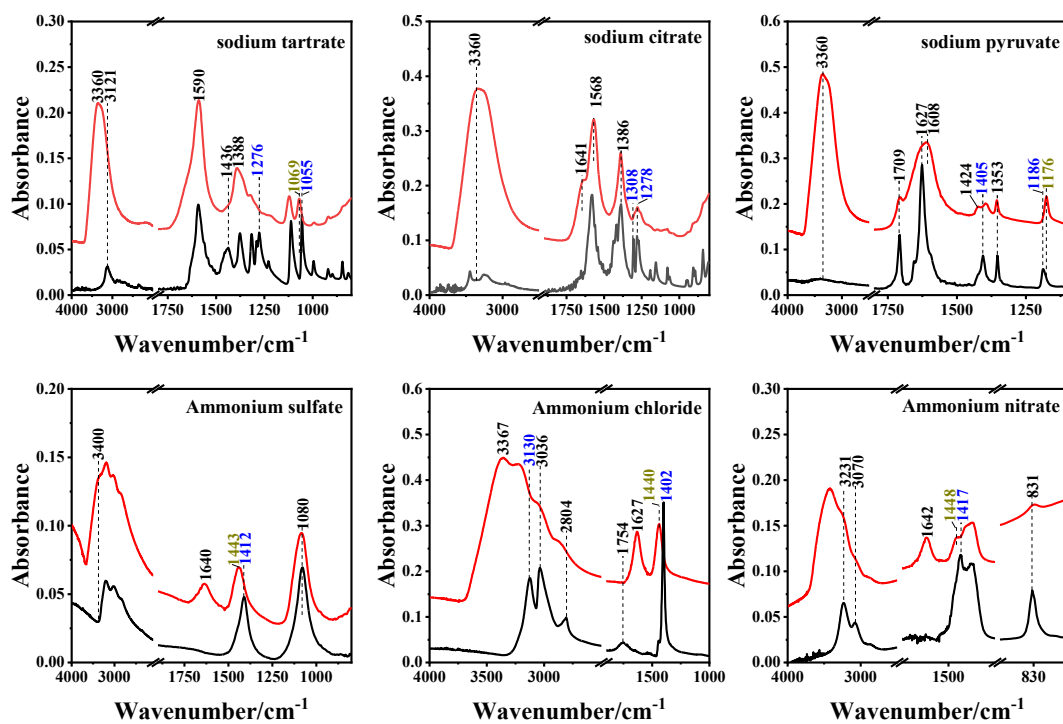

**Fig. S1.** The IR spectra at aqueous (red line) and solid (black) state, as well as the solid features (black value) and solution bands for organic salts and ammonium salts.

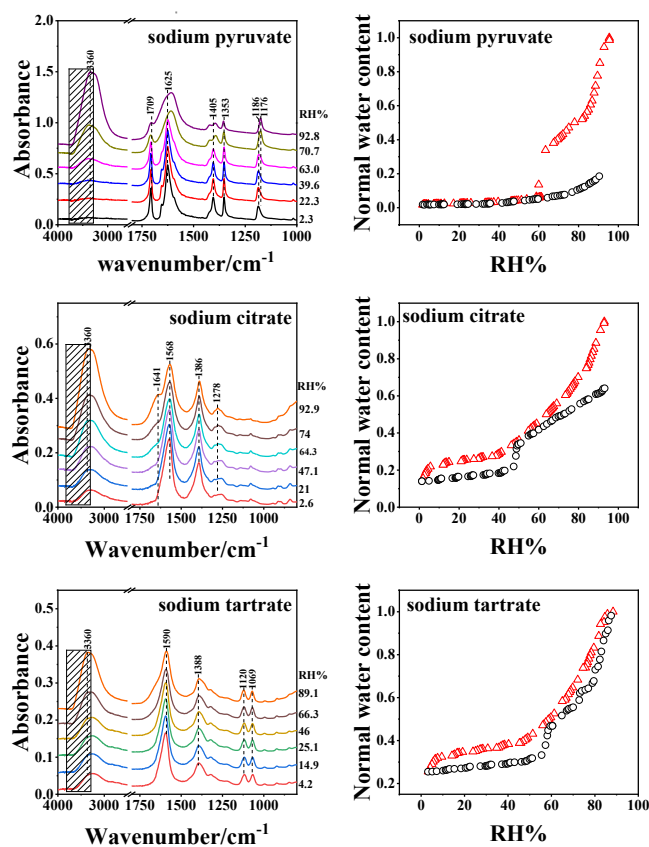

**Fig. S2.** The IR spectra and hygroscopic behavior of organic salts on dehydration and hygroscopic behavior during a down-up RH cycle. The shaded area shows the chosen integration region for liquid water. The spectra for sodium pyruvate was previously reported by Yang et al (2019).

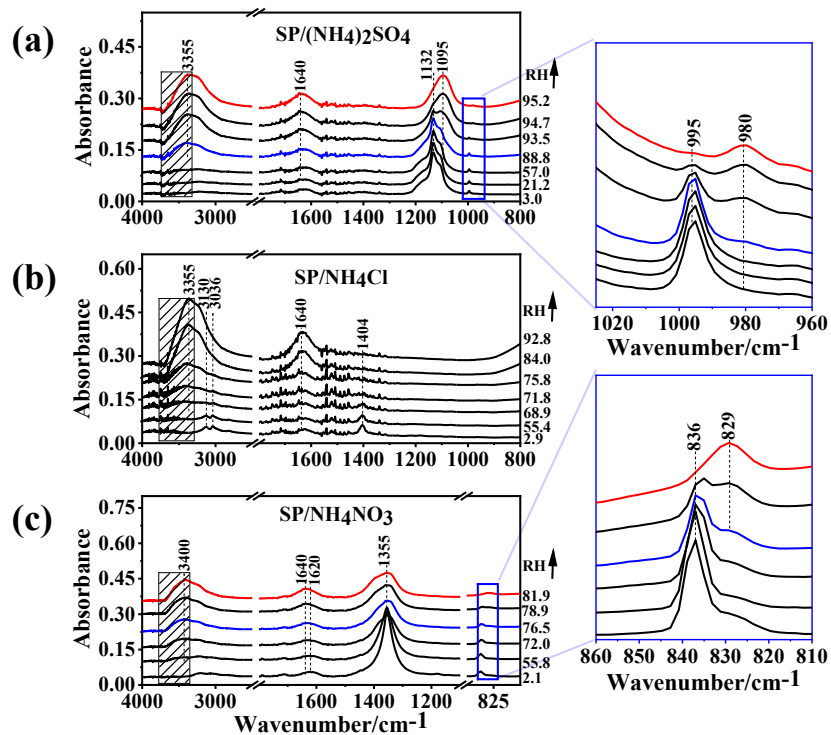

**Fig. S3.** The FTIR spectra of mixed aerosols containing pyruvate sodium and varied ammonium salts which are (a) (NH<sub>4</sub>)<sub>2</sub>SO<sub>4</sub> (b) NH<sub>4</sub>Cl and (c) NH<sub>4</sub>NO<sub>3</sub> on hydration. The shaded area shows the chosen integration region for liquid water.

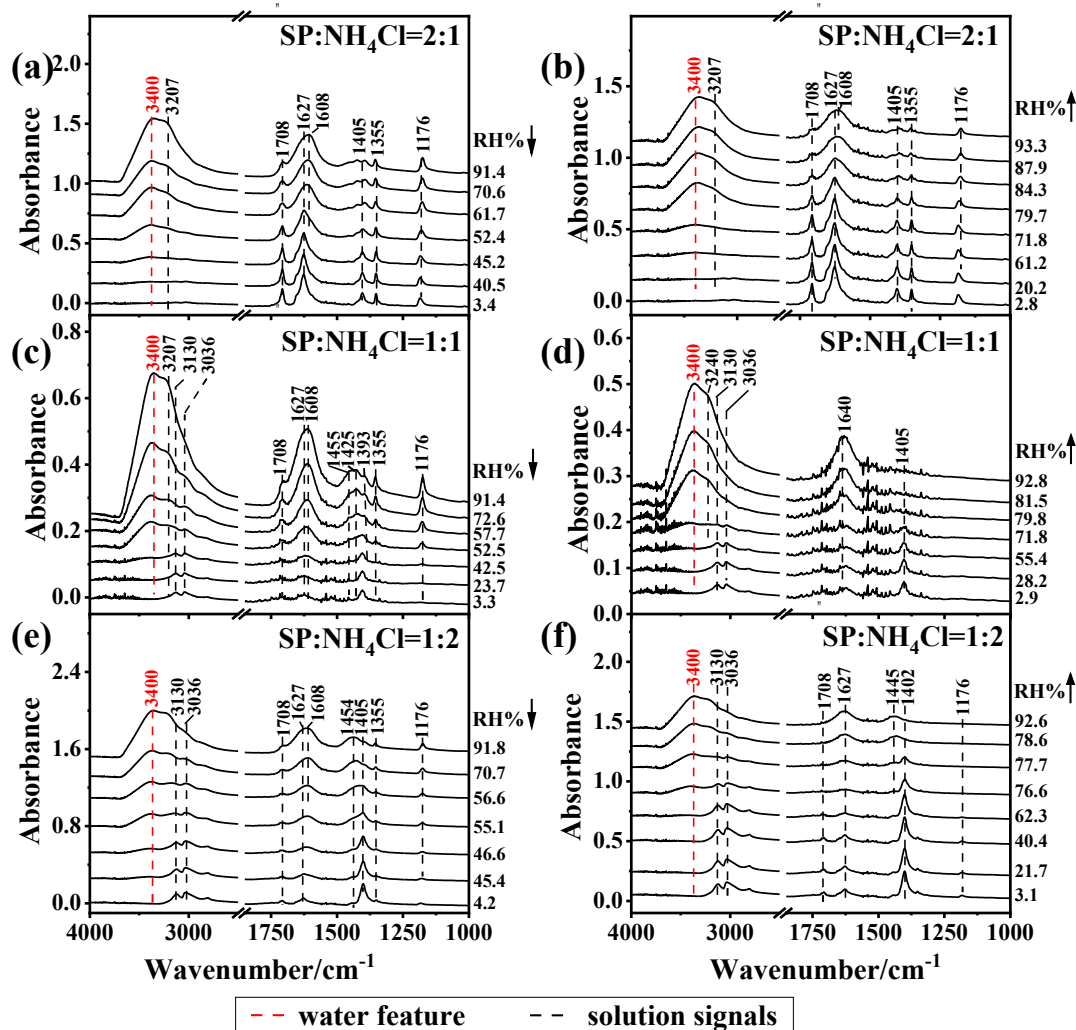

**Fig. S4.** The IR spectra of SP/NH<sub>4</sub>Cl particles with the varied mole ratios during the dehumidification (a), (c), (e) and humidification (b), (d) and (f) respectively.

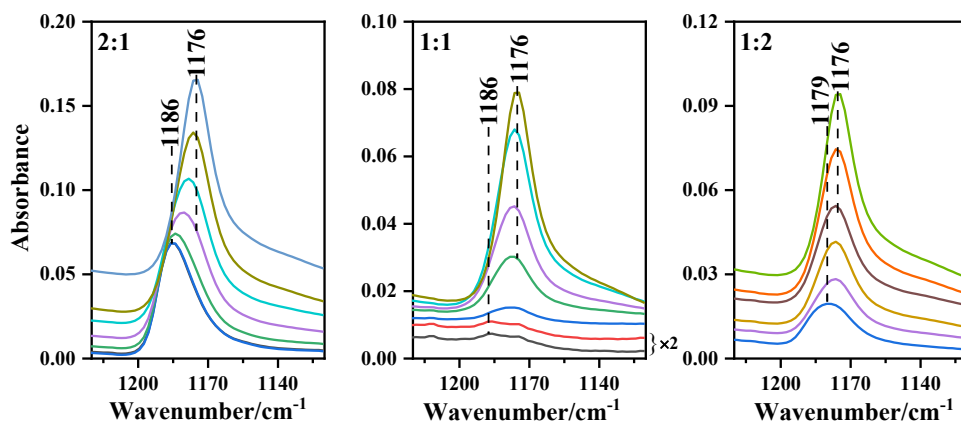

**Fig. S5.** The IR spectral comparison in the region of 1220–1120 cm<sup>-1</sup> for 2:1, 1:1 and 1:2 SP/NH<sub>4</sub>Cl particles during the dehumidification

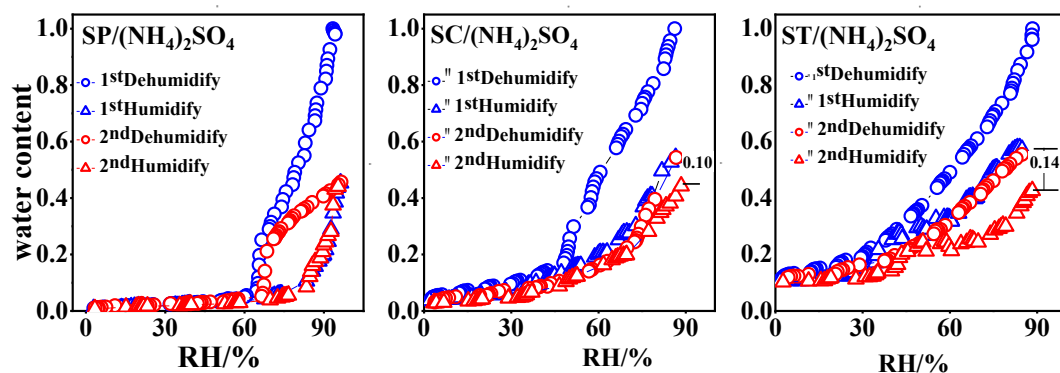

**Fig. S6.** Hygroscopicity curve comparison of particles containing SP : AS (ammonium sulfate) = 2:1, SC: AS = 2:3 and, ST: AS = 1:1 during two down-up RH cycles. The data for SP:AS = 2:1 was reported previous by Yang et al (2019).

## Reference

Yang, H., Wang, N., Pang, S., Zheng, C., Zhang, Y.: Chemical reaction between sodium pyruvate and ammonium sulfate in aerosol particles and resultant sodium sulfate efflorescence, *Chemosphere*, 215, 554–562, <https://doi.org/10.1016/j.chemosphere.2018.10.062>, 2019.
